# Supplementary material
Source: HighWire-hosted journal article supplement (https://ez-admanager.com/highwire/filestream/135278/field_highwire_adjunct_files/0/wand_1508.pdf)
Supplement: wand_1508.pdf [file wand_1508.pdf]

# 레벤티라세탐은 측두엽뇌전증에서 비정상 네트워크 활성화를 감소시킨다

## Levetiracetam reduces abnormal network activations in temporal lobe epilepsy

Britta Wandschneider, MD  
 Jason Stretton, MSc  
 Meneka Sidhu, MD  
 Maria Centeno, MD  
 Lajos R. Kozák, MD, PhD  
 Mark Symms, PhD  
 Pamela J. Thompson, PhD  
 John S. Duncan, FMedSci, FRCP  
 Matthias J. Koepp, PhD

**목적:** 약물저항측두엽뇌전증(temporal lobe epilepsy, TLE) 환자에서 인지네트워크 활성화에 레벤티라세탐(levetiracetam, LEV)이 미치는 영향을 기능적 MRI (functional MRI, fMRI)와 좌측에 지배적인 언어와 우측에 지배적인 시공간 작업기억(working memory, WM) 패러다임을 이용하여 조사하였다.

**방법:** 이 연구는 후향적 연구로, 과제와 연관된 fMRI 활성화와 비활성을 53명의 좌측 TLE와 54명의 우측 TLE 환자에서 LEV 치료를 하는 것(59명)과 하지 않는 것(48명)으로 비교하였다. LEV 치료군에서 활성화 패턴은 일일 LEV 용량과 관계가 있었다.

**결과:** 과제와 증후군의 특정 효과를 분리하였다. LEV를 복용하는 환자는 우측 지배적인 시공간 과제를 하는 동안 우측 TLE에서 우측 측두엽과 언어작업을 하는 동안 좌측 TLE에서 좌측 측두엽의 기능적 네트워크 비활성화가 정상화되었다. 사후분석에서, 유의한 용량 의존적 효과가 우측 TLE에서 시공간 WM 과제 수행 중 확인되었다: 낮은 LEV 용량에서, 우측 해마의 비정상적 활성도가 더 크게 나타났다. 보다 덜 엄격한 역치에서( $P < 0.05$ , 다중비교 무보정), 유사한 용량 효과가 좌측 TLE에서 언어 과제를 수행할 때 관찰되었다: 양측 해마는 낮은 용량에서 더 비정상적 활성도를 보였지만 좌측에서 더 우세하였다.

**결론:** 이러한 결과는 LEV가 정상 활성화 패턴을 복구하는 것과 관계가 있다는 것을 시사한다. 신경 패턴이 약물 반응으로 전환되는지 확인하기 위해서는 종적인 연구가 필요하다.

**근거의 분류:** 이 연구는 약물 불응성 TLE에서 LEV가 내측 측두엽 구조의 불활성화(deactivation)를 용량 의존적으로 촉진하는데 대한 Class III의 근거를 제시한다.

Neurology® 2014;83:1508–1512

Table 2 Kruskal-Wallis test of cognitive performance measures in patients

| Cognitive measures   | Left TLE             |                           | Right TLE            |                           | Analysis |    |       |
|----------------------|----------------------|---------------------------|----------------------|---------------------------|----------|----|-------|
|                      | On LEV, median (IQR) | Without LEV, median (IQR) | On LEV, median (IQR) | Without LEV, median (IQR) | $\chi^2$ | df | p     |
| Verbal IQ            | 93 (17)              | 94 (23.5)                 | 93 (19)              | 99 (21.5)                 | 2.552    | 3  | 0.466 |
| Letter fluency       | 12.5 (6.25)          | 11.5 (9)                  | 14 (8)               | 15 (11)                   | 3.680    | 3  | 0.298 |
| Category fluency     | 19 (10)              | 18 (7)                    | 19 (8)               | 18 (8)                    | 0.490    | 3  | 0.921 |
| Digit span backwards | 4 (1)                | 4 (1)                     | 4 (2)                | 3.5 (1.75)                | 0.351    | 3  | 0.950 |
| WCST categories      | 6 (1)                | 6 (1)                     | 6 (1)                | 6 (3)                     | 1.404    | 3  | 0.705 |
| 2-db, % correct      | 52 (31)              | 61 (33)                   | 54 (33)              | 65 (40)                   | 1.983    | 3  | 0.576 |
| 2-nb, % correct      | 93.5 (23.75)         | 98 (14)                   | 97 (15.75)           | 97 (14)                   | 1.573    | 3  | 0.665 |

Abbreviations: db = dot-back; LEV = levetiracetam; nb = n-back; TLE = temporal lobe epilepsy; WCST = Wisconsin Card-Sorting Test. Level of significance:  $p < 0.05$ .

Figure 1 Group comparisons between patients with and without levetiracetam during the 2 working memory functional MRI paradigms

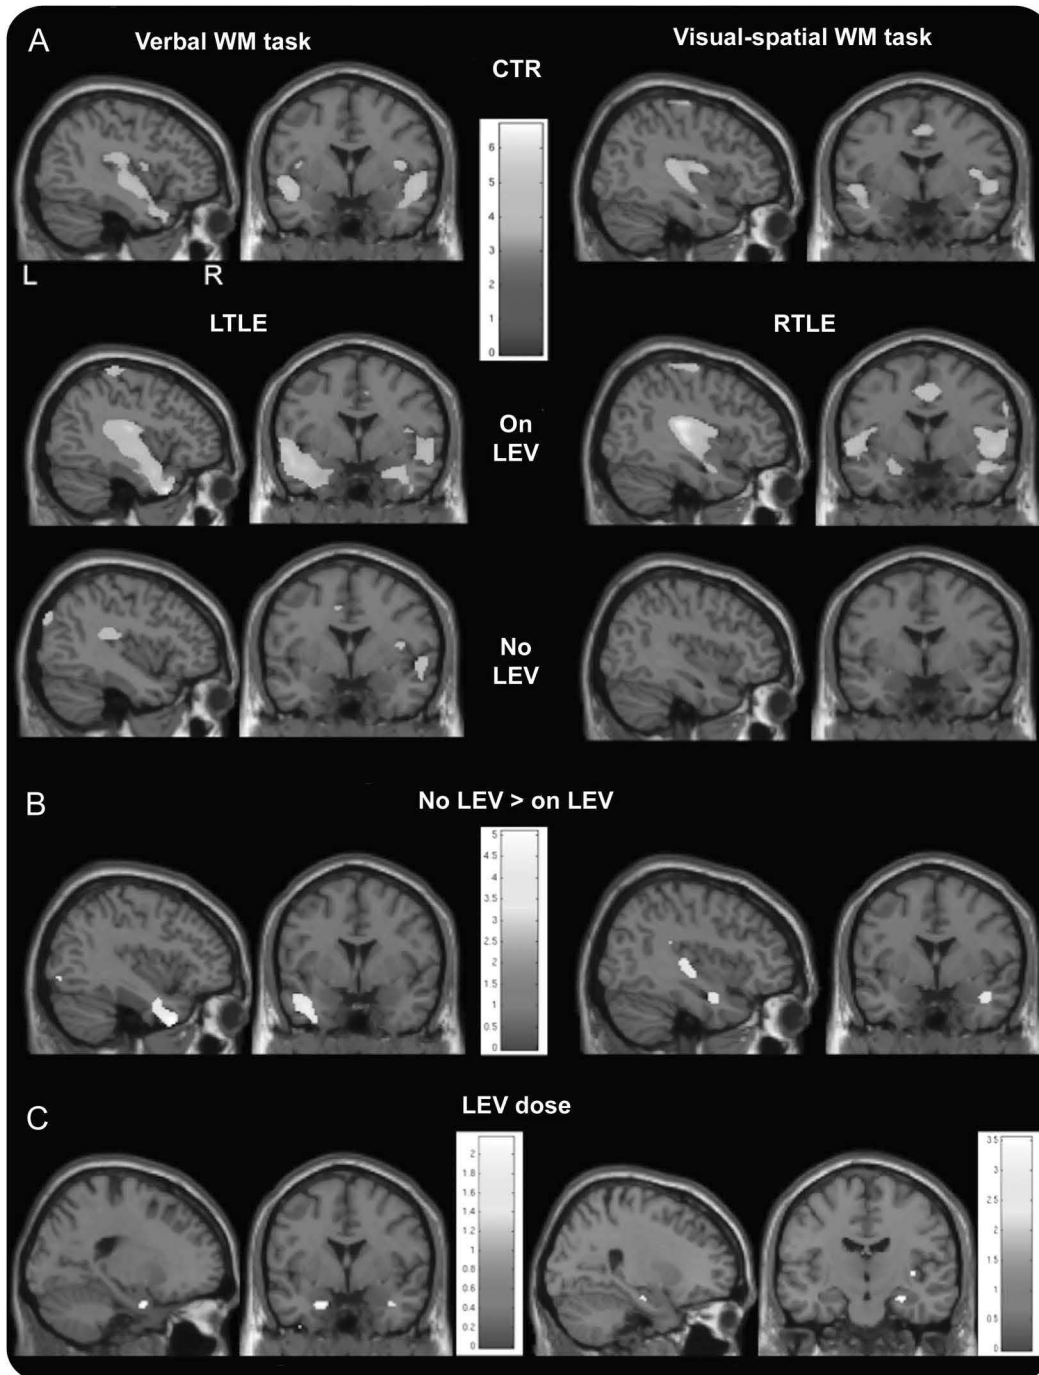

Group maps of areas of task-related deactivation networks in controls and all patients during the left- and right-lateralizing task are demonstrated. Whereas healthy controls and patients on levetiracetam (LEV) show similar patterns of deactivation, patients without LEV show less deactivation in the medial temporal lobe areas than both controls and patients on LEV in either lateralizing task (A). During the verbal working memory (WM) task, patients with left temporal lobe epilepsy (LTLE) without LEV significantly fail to deactivate the left midtemporal gyrus (B; LTLE without LEV > LTLE with LEV,  $p < 0.001$ , 20-voxel threshold extent). During the right-lateralizing visual-spatial task, patients with right TLE (RTLE) who are not treated with LEV fail to deactivate the right hippocampus (B; RTLE without LEV > RTLE with LEV,  $p < 0.001$ , 20-voxel threshold extent). A post hoc analysis in patients treated with LEV demonstrated a dose-dependent effect of mesial temporal lobe deactivation through LEV. The lower the LEV dose, the lesser the right hippocampus is deactivated during the visual-spatial WM task (C;  $p < 0.001$ , 20-voxel threshold extent). A similar dose effect is observed in patients with LTLE during the verbal WM task at a lower level of significance (C;  $p < 0.05$ , uncorrected). The left > right hippocampus becomes less strongly deactivated with lower LEV dose (C). Inclusively masked for task-related deactivation networks ( $p < 0.05$ ). CTR = healthy controls.
